# Supplementary material for: Syndecan-3 and TFPI Colocalize on the Surface of Endothelial-, Smooth Muscle-, and Cancer Cells
Source: PubMed Central journal article supplement (PMC4305309; doi:10.1371/journal.pone.0117404), 2015-01-24

### Syndecan 1-4 knock down

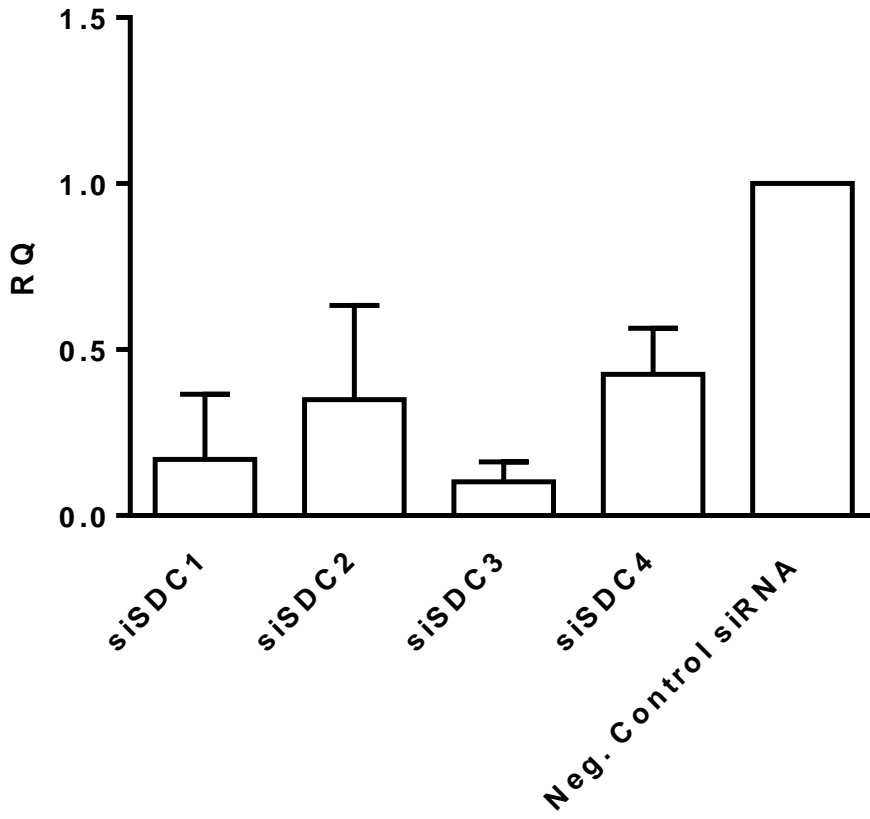

Supplement: pone.0117404.s001.pdf [file pone.0117404.s001.pdf]
