# Supplementary material for: Syndecan-3 and TFPI Colocalize on the Surface of Endothelial-, Smooth Muscle-, and Cancer Cells
Source: PubMed Central journal article supplement (PMC4305309; doi:10.1371/journal.pone.0117404), 2015-01-24

**A**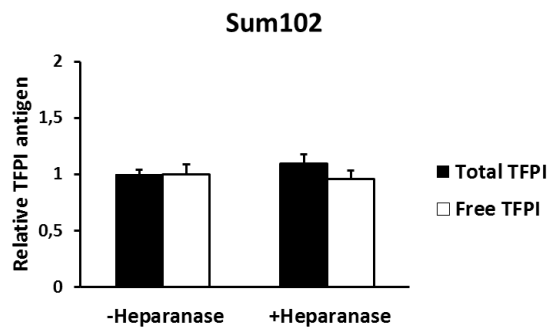**B**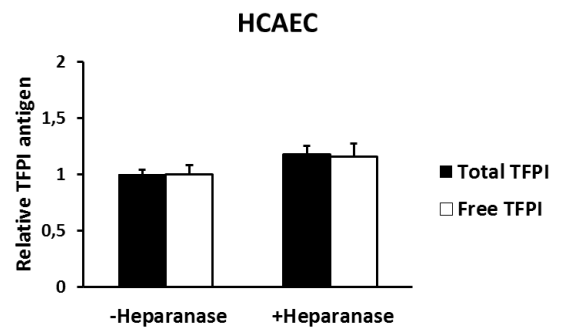**C**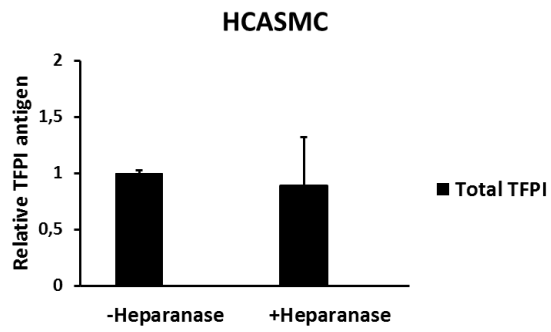

Supplement: pone.0117404.s002.pdf [file pone.0117404.s002.pdf]
