# Supplementary material for: Syndecan-3 and TFPI Colocalize on the Surface of Endothelial-, Smooth Muscle-, and Cancer Cells
Source: PubMed Central journal article supplement (PMC4305309; doi:10.1371/journal.pone.0117404), 2015-01-24

**A****Stable TFPI knock down in Sum 102 cells**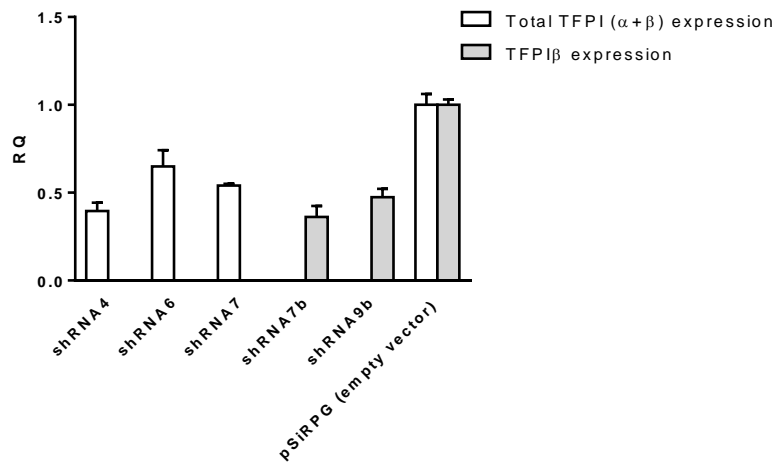**B****Transient TFPI knock down in HCAEC cells**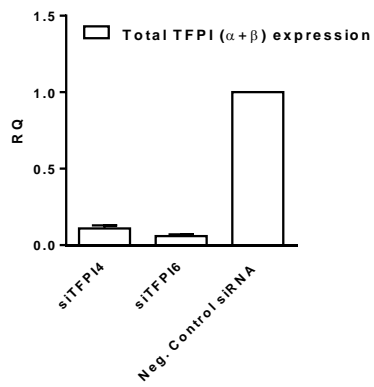**Transient TFPI knock down in HCASMC cells**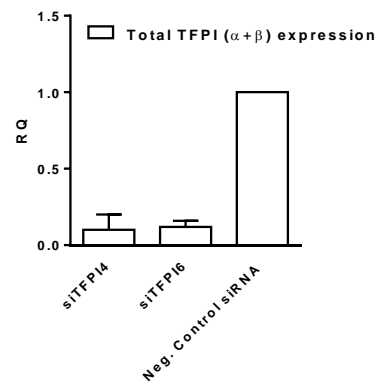**C****Transient TFPI $\alpha$  knock down in HCAEC cells**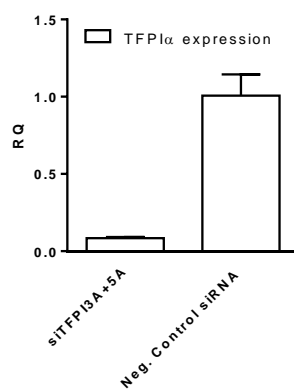**Transient TFPI $\alpha$  knock down in Sum 102 cells**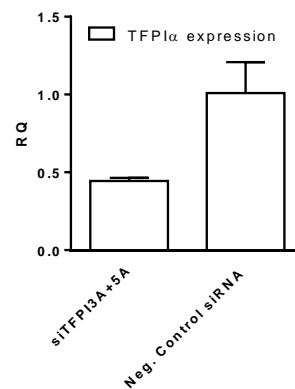

Supplement: pone.0117404.s003.pdf [file pone.0117404.s003.pdf]
