# Supplementary material for: Syndecan-3 and TFPI Colocalize on the Surface of Endothelial-, Smooth Muscle-, and Cancer Cells
Source: PubMed Central journal article supplement (PMC4305309; doi:10.1371/journal.pone.0117404), 2015-01-24
Supplement: pone.0117404.s006.pdf [file pone.0117404.s006.pdf]

**Table S1. Sequences of siRNA directed against syndecans.**

| <b>siRNA</b> | <b>Target mRNA</b> | <b>Sequence 5'→ 3'</b> |                                                |
|--------------|--------------------|------------------------|------------------------------------------------|
| SDC1         | Syndecan 1         | Sense<br>Antisense     | CACCAUUCUGACUCGGUUUCU<br>AGAAACCGAGUCAGAAUGGUG |
| SDC2         | Syndecan 2         | Sense<br>Antisense     | CCAUCCAGUGCUGCUUAUC<br>GAUAAGCAGCACUGGAUGG     |
| SDC3         | Syndecan 3         | Sense<br>Antisense     | CCAUACCUGUCCUGAGUUC<br>GAACUCAGGACAGGUAUGG     |
| SDC4         | Syndecan 4         | Sense<br>Antisense     | GUUGUCCAUCCCUUGGUGC<br>GCACCAAGGGAUGGACAAC     |
