# Supplementary material for: Syndecan-3 and TFPI Colocalize on the Surface of Endothelial-, Smooth Muscle-, and Cancer Cells
Source: PubMed Central journal article supplement (PMC4305309; doi:10.1371/journal.pone.0117404), 2015-01-24
Supplement: pone.0117404.s007.pdf [file pone.0117404.s007.pdf]

**Table 2. Probe ID and primer sequences of syndecans (SDC).**

| <b>Gene Probe</b> | <b>ID*</b> | <b>Forward primer 5'→ 3'</b> | <b>Reverse primer 5'→ 3'</b> |
|-------------------|------------|------------------------------|------------------------------|
| SDC-1             | #66        | aggatggaggtccttctgc          | ccgaggttcaaaggtgaagt         |
| SDC-2             | #22        | aaacggacagaagtctagcag        | aaattgcaaagagaaagccaat       |
| SDC-3             | #15        | tgaactggatgaccttactcg        | cgcattggctgtctcaatg          |
| SDC-4             | #21        | ggcaggaatctgatgactttg        | ggccgatcatggagtcttc          |

\* Probes from The Universal Probe Library (Roche Applied Sciences)
